# Supplementary material
Source: publisher figshare collection journal article supplement (https://karger.figshare.com/ndownloader/files/13839818)
Supplement: Supplementary file 1 [file 13839818]

**Supplemental Table 1. TLR agonists.**

| **Agonist** | **Pam3CSK4** | **HKLM** | **Poly (I:C) HMW** | **Poly (I:C) LMW** | **LPS** | **Flagellin** | **FSL-1** | **Imiquimod** | **ssRNA40** | **ODN2006** |
| --- | --- | --- | --- | --- | --- | --- | --- | --- | --- | --- |
| **Receptor** | **TLR1/2** | **TLR2** | **TLR3** | **TLR3** | **TLR4** | **TLR5** | **TLR6/2** | **TLR7** | **TLR8** | **TLR9** |
| **Maximal concentration** | **1 µg.mL-1** | **108 cells.mL-** | **10 µg.mL-1** | **10 µg.mL-1** | **10 µg.mL-1** | **1 µg.mL-1** | **1 µg.mL-1** | **1 µg.mL-1** | **1 µg.mL-1** | **4 µM** |

**Supplemental Table 2. TLR TaqMan assays.**

| Receptor | TaqMan assay |
| --- | --- |
| TLR1 | Hs00413978_m1 |
| TLR2 | Hs01014511_m1 |
| TLR3 | Hs01551078_m1 |
| TLR4 | Hs00152939_m1 |
| TLR5 | Hs00152825_m1 |
| TLR6 | Hs00271977_s1 |
| TLR7 | Hs00152971_m1 |
| TLR8 | Hs00607866_mH |
| TLR9 | Hs00152973_m1 |
| TLR10 | Hs01675179_m1 |
